# Supplementary material for: Synthesis of NiMoO4/NiMo@NiS Nanorods for Efficient Hydrogen Evolution Reactions in Electrocatalysts
Source: MDPI journal article supplement (doi:10.3390/nano13121871), 2023-06-16
Supplement: s1 [file s1]

---

## *Supporting Information*

### **S1. Materials and Methods**

#### **S1.1. Chemicals and reagents**

Graphite flake, Nickel nitrate hexahydrate  $[\text{Ni}(\text{NO}_3)_2 \cdot 6\text{H}_2\text{O}]$ , ammonium molybdate  $[(\text{NH}_4)_6\text{Mo}_7\text{O}_{24} \cdot 4\text{H}_2\text{O}]$ , hydrochloric acid (HCl, 37%) were purchased from Macklin Reagent Co., Ltd. Potassium hydroxide (KOH), Thiourea ( $\text{CH}_4\text{N}_2\text{S}$ ), Sodium citrate dihydrate  $[\text{C}_6\text{H}_5\text{Na}_3\text{O}_7 \cdot 2\text{H}_2\text{O}]$  were purchased from aladdin Co., Ltd. Ni foam (NF) was purchased from Shanxi lizhiyuan materials Technology Co., Ltd. All chemicals were analytical grade and used without further purification.

#### **S1.2. Synthesis of NF@NiS**

To prepare the NF sample, the NF was cut into four  $1\text{ cm} \times 2\text{ cm}$  pieces and placed in a clean Petri dish for later use. During the electrochemical deposition process, the CHI 760E workstation, comprising a three-electrode system, was utilized. The working, reference, and counter electrodes were composed of NF, a saturated silver/silver chloride electrode, and a platinum wire, respectively. The electrolyte solution consisted of approximately 50 mL of 5 mM  $\text{Ni}(\text{NO}_3)_2 \cdot 6\text{H}_2\text{O}$ , 5 mM  $\text{CH}_4\text{N}_2\text{S}$ , and 7.5 mM  $\text{Na}_3\text{C}_6\text{H}_5\text{O}_7 \cdot 2\text{H}_2\text{O}$ . To achieve the desired deposition quality, the deposition voltage, time, and stirring speed were optimized to be -0.8 V, 600 s, and 300 rpm, respectively.

### **S2. Electrochemical HER Performance**

HER (Hydrogen Evolution Reaction) is the hydrogen-producing reaction in the process of electrolysis of water, which reduces water to hydrogen gas ( $\text{H}_2$ ) under electrochemical conditions in aqueous solution. Its mechanism mainly involves reactions of water molecules, electrons, cations, and protons.

The basic mechanism of HER reaction includes the following three steps:

Adsorption: water molecules are adsorbed onto the electrode surface by electrostatic or hydrogen-bonding attractions.

---

Reaction: when the electrode is subjected to an electrical potential, electrons are transferred from the electrode to reduce water molecules to hydroxide ions ( $\text{OH}^-$ ) and one electron.

Dissociation: after the  $\text{OH}^-$  ion loses another proton, the resulting  $\text{O}^{2-}$  ion detaches from the electrode, and the remaining two hydrogen ions combine to form  $\text{H}_2$  and are released.

The electrocatalytic hydrogen evolution reaction of the samples was tested in a three-electrode system by an electrochemical workstation (Chenhua, CHI 760E) under alkaline conditions. In which the nickel foam loaded sample was used as the working electrode,  $\text{Hg}/\text{HgO}$  as the reference electrode and graphite rod as the counter electrode, respectively. For the LSV test, the voltage window of the scan ranged from -0.8 V to -1.5 V, and the scan rate was 0.005 V/s, and 90 % IR compensation. The EIS of the samples were obtained by testing under open-circuit voltage conditions in the frequency range of 0.01 Hz to 100000 Hz. The electric double layer capacitance ( $C_{\text{dl}}$ ) was calculated by measuring the CV curves in the non-Faraday interval at different sweep rates of the sample. The stability test of the samples was obtained by chronoamperometry (i-t) and after 1000 CV cycling tests. The Tafel slope was obtained by converting the LSV curves to the following equation

$$\eta = a + b \times \log J, \quad (\text{S1})$$

where  $\eta$  is the overpotential,  $J$  is the current density, and  $b$  is the Tafel slope.

All tests were performed at room temperature and the measured electrochemical data were converted to standard hydrogen electrodes in 1 mol/L KOH electrolyte by the equation

$$E(\text{RHE}) = E(\text{Hg}/\text{HgO}) + 0.098 + 0.0591 \times \text{pH} \quad (\text{S2})$$

In the process of water electrolysis for hydrogen production,  $E(\text{RHE})$  represents the reference electrode potential, which can be measured relative to the potential of a mercury/mercury oxide electrode ( $\text{Hg}/\text{HgO}$ ). On the other hand,  $E(\text{Hg}/\text{HgO})$  refers to the potential of the mercury/mercury oxide electrode used as the reference electrode.

---

The term 0.098V refers to the difference between the standard electrode potential and the standard hydrogen electrode (SHE) at room temperature, also known as the zero-point shift. pH indicates the acidity or alkalinity of the solution.

### S2.1. Synthesis of Pt/C/NF electrode

The Pt/C catalyst was prepared by mixing 5 mg of commercial Pt/C (20 wt%) in a 5 wt% Nafion (50  $\mu$ L) solution of anhydrous ethanol (380  $\mu$ L) and water (570  $\mu$ L). A 5 wt% Nafion (50  $\mu$ L) solution containing anhydrous ethanol (380  $\mu$ L) and water (570  $\mu$ L) was strictly sonicated for 30 min to ensure uniform mixing of the Pt/C suspension. A total of 400  $\mu$ L Pt/C catalyst was dropped on NF (1 cm  $\times$  1 cm) to prepare Pt/C/NF electrodes.

### S3. Characterizations

X-ray diffraction (XRD) analysis was performed using a Rigaku Smart Lab 9 kW high-resolution system and Cu K $\alpha$  radiation, which was used to analyze the phase composition of the material with a scan range of 10-90°. The morphology and structure of the composites were recorded by scanning electron microscopy (SEM, JSM-7610F) and transmission electron microscopy (TEM, FEI Themis Z, 300 kV). X-ray photoelectron spectroscopy (XPS, Thermo ESCALAB 250Xi) was used to probe the elemental composition and valence of the catalysts.

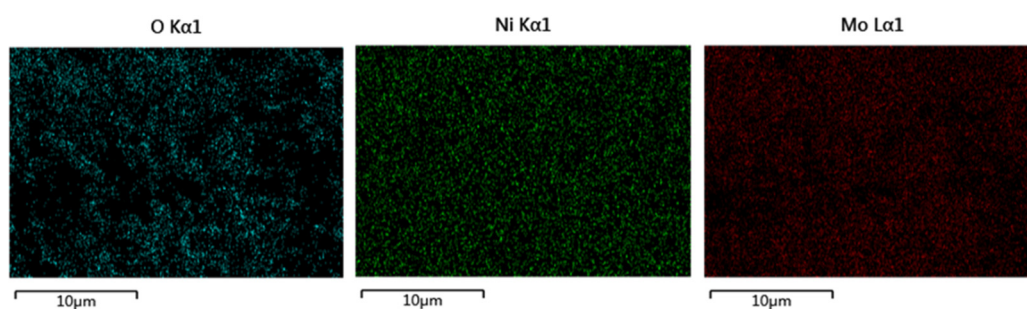

Figure S1. The EDS images of NF/NiMoO<sub>4</sub>/NiMo.

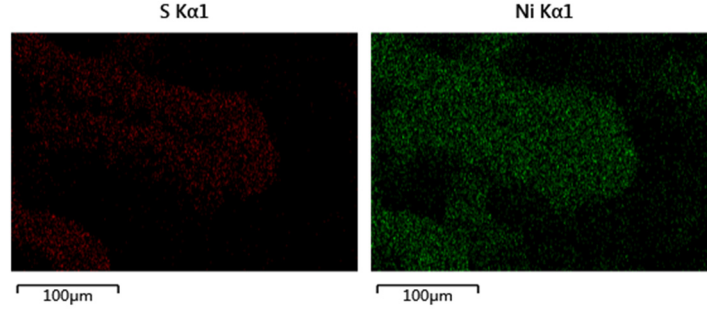

Figure S2. The EDS images of NF@NiS.

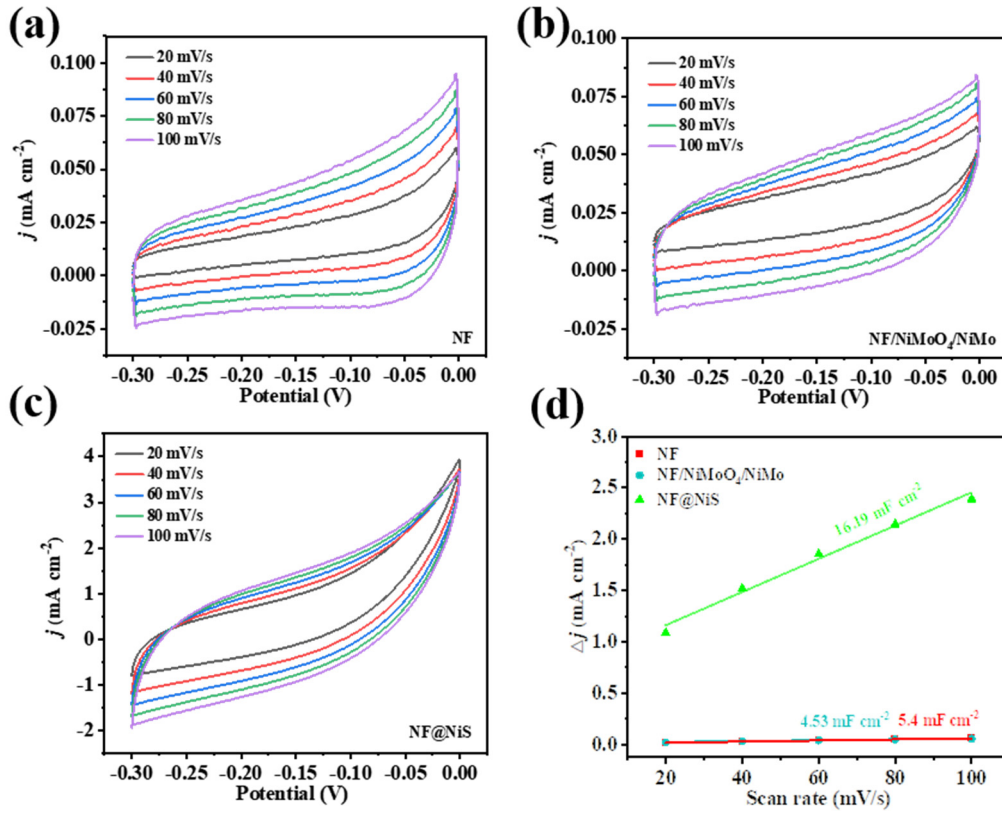

Figure S3. (a) (b)(c) Electrochemical CVs of contrast samples measured at different scan rates. (d) Electric double-layer capacitance for each sample.

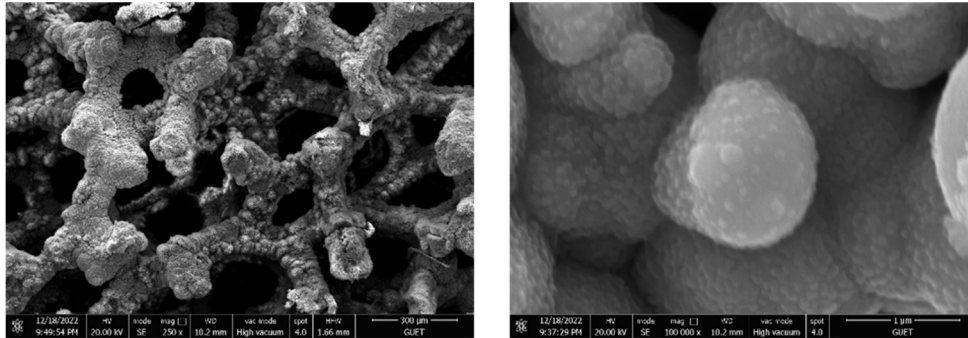

Figure S4 SEM images after reaction.

**Table S1.** HER electrocatalysis performance of some typical catalysts reported previously.

| Sample                                                           | Electrolyte                             | Overpotential<br>at 10 mA cm <sup>-2</sup><br>(mV) | Current<br>density<br>(mA/cm <sup>2</sup> ) | Tafel<br>slope<br>(mV<br>dec <sup>-1</sup> ) | References |
|------------------------------------------------------------------|-----------------------------------------|----------------------------------------------------|---------------------------------------------|----------------------------------------------|------------|
| <b>NiMoO<sub>4</sub>/NiMo@NiS</b>                                | 1.0 M<br>KOH                            | 36                                                 | 10                                          | 40.2                                         | this work  |
| <b>Co-Ni<sub>3</sub>S<sub>2</sub>/NF</b>                         | 1.0 M<br>KOH                            | 148                                                | 10                                          | 68                                           | [1]        |
| <b>Ni<sub>3</sub>S<sub>2</sub>/NiS</b>                           | 1.0 M<br>KOH                            | 129                                                | 10                                          | 75.5                                         | [2]        |
| <b>Ni(OH)<sub>2</sub>/CoNi<sub>2</sub>S<sub>4</sub>/NF</b>       | 0.5 M<br>H <sub>2</sub> SO <sub>4</sub> | 124                                                | 10                                          | 84                                           | [3]        |
| <b>Zr-MOF/NiS<sub>2</sub></b>                                    | 0.5 M<br>H <sub>2</sub> SO <sub>4</sub> | 110                                                | 10                                          | -                                            | [4]        |
| <b>Cu<sub>7.2</sub>S<sub>4</sub>@NiS<sub>2</sub>@NiS/NF</b>      | 1.0 M<br>KOH                            | 87                                                 | 10                                          | 43.7                                         | [5]        |
| <b>N-PECVD</b>                                                   | 0.5 M<br>H <sub>2</sub> SO <sub>4</sub> | 90                                                 | 10                                          | 80                                           | [6]        |
| <b>Ni-S</b>                                                      | 1.0 M<br>KOH                            | 58                                                 | 100                                         | 81.6                                         | [7]        |
| <b>Cu<sub>2</sub>S/Ni<sub>3</sub>S<sub>2</sub></b>               | 1.0 M<br>KOH                            | 50                                                 | 10                                          | -                                            | [8]        |
| <b>NiCo<sub>2</sub>S<sub>4</sub>/Ni<sub>3</sub>S<sub>2</sub></b> | 1.0 M<br>KOH                            | 111                                                | 10                                          | 57                                           | [9]        |

---

## Reference

- [1] Sun K, Qiao F, Yang J, et al. Fluff spherical Co-Ni<sub>3</sub>S<sub>2</sub>/NF for enhanced hydrogen evolution[J]. *Int. J. Hydrogen Energy*, 2022, 47(65): 27986-27995.
- [2] Chen M, Su Q, Kitiphatpiboon, N.; Zhang, J.; Feng, C.; Li, S.; Zhao, Q.; Abudula, A.; Ma, Y.; Guan, G. Heterojunction engineering of Ni<sub>3</sub>S<sub>2</sub>/NiS nanowire for electrochemical hydrogen evolution. *Fuel* **2023**, 331, 1257944.
- [3] Wu, Y.; Su, L.; Wang, Q.; Ren, S. In situ preparation of Ni(OH)<sub>2</sub>/CoNi<sub>2</sub>S<sub>4</sub>/NF composite as efficient electrocatalyst for hydrogen evolution reaction. *Ionics* **2023**, 29, 675–683.
- [4] He, N.; Chen, X.; Fang, B.; Li, Y.; Lu, T.; Pan, L. Zr-MOF/NiS<sub>2</sub> hybrids on nickel foam as advanced electrocatalysts for efficient hydrogen evolution. *J. Colloid Interface Sci.* **2023**, 640, 820–828.
- [5] Gong, Y.; Lin, Y.; Yang, Z.; Jiao, F.; Li, J.; Wang, W. High-performance bifunctional flower-like Mn-doped Cu<sub>7.2</sub>S<sub>4</sub>@NiS<sub>2</sub>@NiS/NF catalyst for overall water splitting. *Appl. Surface Sci.* **2019**, 476, 840–849.
- [6] Sun, M.; Wang, Z.; Gao, B.; Wang, S.; Wang, C.; Song, X.; Lin, D. Electrocatalytic hydrogen evolution properties of anionic NiS<sub>2</sub>-Ni(OH)<sub>2</sub> nanosheets produced on the surface of nickel foam. *Int. J. Energy Res.* **2020**, 44, 4827–4836.
- [7] Wu, Y.; Lian, J.; Wang, Y.; Sun, J.; He, Z.; Gu, Z. Potentiostatic electrodeposition of self-supported NiS electrocatalyst supported on Ni foam for efficient hydrogen evolution. *Mater. Des.* **2021**, 198, 109316.
- [8] Peng, Y.; He, H. Novel heterostructure Cu<sub>2</sub>S/Ni<sub>3</sub>S<sub>2</sub> coral-like nanoarrays on Ni foam

---

to enhance hydrogen evolution reaction in alkaline media. *RSC Adv.* **2021**, *11*, 39493–39502.

[9] Xu, X.; Liu, Q.; Zhong, W.; Zhang, L.; Lu, Y.; Du, Y. Construction of NiCo<sub>2</sub>S<sub>4</sub>/Ni<sub>3</sub>S<sub>2</sub> nanoarrays on Ni foam substrate as an enhanced electrode for hydrogen evolution reaction and supercapacitors. *Int. J. Hydrog. Energy* **2021**, *46*, 39226–39235.
